# Supplementary material for: The contribution of soil extract composition and cyclic moisture dynamics to the physicochemical aging of superabsorbent polyacrylic acid and polyacrylamide hydrogels
Source: Research Square preprint supplement (doi:10.21203/rs.3.rs-7155517/v1), 2025-07-25
Supplement: Supplementary file 1 [file a29aa19c67a058ac7c0d2cf9.pdf]

**Table 2:** Permutational analysis of variance (PERMANOVA) of a)  $T_{2WL}$ , b)  $T_{2peak}$ , c)  $\tau_{YP}$ , d)  $\tau_{max}$  and e) SI as function of the polymer type and soil extract of the FSE. Significant effects and interactions are shown marked in bold, respectively.

| <b>a</b> $T_{2WL}$            |    |        |      |          |              |
|-------------------------------|----|--------|------|----------|--------------|
|                               | Df | Sum Sq | R2   | F value  | Pr(>F)       |
| Polymer type                  | 1  | 2.66   | 0.09 | 84.61    | <b>0.001</b> |
| Soil extract                  | 2  | 24.84  | 0.86 | 394.45   | <b>0.001</b> |
| Polymer type:<br>soil extract | 2  | 0.74   | 0.03 | 11.78    | <b>0.002</b> |
| Residuals                     | 24 | 0.76   | 0.03 |          |              |
| <b>b</b> $T_{2peak}$          |    |        |      |          |              |
|                               | Df | Sum Sq | R2   | F value  | Pr(>F)       |
| Polymer type                  | 1  | 3.29   | 0.11 | 136.42   | <b>0.001</b> |
| Soil extract                  | 2  | 24.38  | 0.84 | 506.27   | <b>0.001</b> |
| Polymer type:<br>soil extract | 2  | 0.75   | 0.03 | 15.64    | <b>0.001</b> |
| Residuals                     | 24 | 0.58   | 0.02 |          |              |
| <b>c</b> $\tau_{YP}$          |    |        |      |          |              |
|                               | Df | Sum Sq | R2   | F value  | Pr(>F)       |
| Polymer type                  | 1  | 12.58  | 0.43 | 25.43    | <b>0.001</b> |
| Soil extract                  | 2  | 2.97   | 0.10 | 3.00     | 0.058        |
| Polymer type:<br>soil extract | 2  | 1.59   | 0.05 | 1.61     | 0.218        |
| Residuals                     | 24 | 11.87  | 0.41 |          |              |
| <b>d</b> $\tau_{max}$         |    |        |      |          |              |
|                               | Df | Sum Sq | R2   | F value  | Pr(>F)       |
| Polymer type                  | 1  | 19.26  | 0.66 | 70.08    | <b>0.001</b> |
| Soil extract                  | 2  | 2.04   | 0.07 | 3.71     | <b>0.040</b> |
| Polymer type:<br>soil extract | 2  | 1.11   | 0.04 | 2.02     | 0.176        |
| Residuals                     | 24 | 6.59   | 0.23 |          |              |
| <b>e</b> SI                   |    |        |      |          |              |
|                               | Df | Sum Sq | R2   | F value  | Pr(>F)       |
| Polymer type                  | 1  | 23.43  | 0.81 | 2,377.71 | <b>0.001</b> |
| Soil extract                  | 2  | 5.09   | 0.18 | 258.37   | <b>0.001</b> |
| Polymer type:<br>soil extract | 2  | 0.24   | 0.01 | 11.97    | <b>0.001</b> |
| Residuals                     | 24 | 0.24   | 0.01 |          |              |
