# Supplementary material for: The contribution of soil extract composition and cyclic moisture dynamics to the physicochemical aging of superabsorbent polyacrylic acid and polyacrylamide hydrogels
Source: Research Square preprint supplement (doi:10.21203/rs.3.rs-7155517/v1), 2025-07-25
Supplement: Supplementary file 2 [file f3b47b7f6a87510fca9898be.pdf]

**Table 1:** Permutational analysis of variance (PERMANOVA) of a)  $T_{2WL}$ , b)  $T_{2peak}$ , c)  $\tau_{YP}$ , d)  $\tau_{max}$  and e) SI as function of the polymer type, soil extract and drying-rewetting cycle (cycle) of the IE. Significant effects and interactions are shown marked in bold, respectively.

| <b>a</b> $T_{2WL}$                  |     |        |      |         |              |
|-------------------------------------|-----|--------|------|---------|--------------|
|                                     | Df  | Sum Sq | R2   | F value | Pr(>F)       |
| Polymer type                        | 1   | 9.33   | 0.07 | 162.18  | <b>0.001</b> |
| Soil extract                        | 3   | 104.98 | 0.81 | 608.50  | <b>0.001</b> |
| cycle                               | 3   | 2.05   | 0.02 | 11.87   | <b>0.001</b> |
| Polymer type:<br>soil extract       | 3   | 4.80   | 0.04 | 27.82   | <b>0.001</b> |
| Polymer type:<br>cycle              | 3   | 0.32   | 0.00 | 1.86    | 0.153        |
| Soil extract:cycle                  | 6   | 0.86   | 0.01 | 2.49    | <b>0.026</b> |
| Polymer type:<br>soil extract:cycle | 6   | 0.69   | 0.01 | 1.99    | 0.083        |
| Residuals                           | 104 | 5.98   | 0.05 |         |              |

  

| <b>b</b> $T_{2peak}$                |     |        |       |         |              |
|-------------------------------------|-----|--------|-------|---------|--------------|
|                                     | Df  | Sum Sq | R2    | F value | Pr(>F)       |
| Polymer type                        | 1   | 2.04   | 0.016 | 2.70    | <b>0.001</b> |
| Soil extract                        | 3   | 4.61   | 0.034 | 2.03    | 0.155        |
| cycle                               | 3   | 6.56   | 0.05  | 2.89    | <b>0.008</b> |
| Polymer type:<br>soil extract       | 3   | 4.52   | 0.04  | 2.00    | 0.081        |
| Polymer type:<br>cycle              | 3   | 6.55   | 0.05  | 2.89    | <b>0.020</b> |
| Soil extract:cycle                  | 6   | 13.09  | 0.10  | 2.89    | <b>0.011</b> |
| Polymer type:<br>soil extract:cycle | 6   | 13.09  | 0.10  | 2.89    | <b>0.018</b> |
| Residuals                           | 104 | 78.55  | 0.61  |         |              |

  

| <b>c</b> $\tau_{YP}$                |     |        |      |         |              |
|-------------------------------------|-----|--------|------|---------|--------------|
|                                     | Df  | Sum Sq | R2   | F value | Pr(>F)       |
| Polymer type                        | 1   | 50.38  | 0.39 | 100.42  | <b>0.001</b> |
| Soil extract                        | 3   | 15.84  | 0.12 | 10.53   | <b>0.001</b> |
| cycle                               | 3   | 1.55   | 0.01 | 1.03    | 0.398        |
| Polymer type:<br>soil extract       | 3   | 1.11   | 0.01 | 0.74    | 0.525        |
| Polymer type:<br>cycle              | 3   | 2.01   | 0.02 | 1.34    | 0.276        |
| Soil extract:cycle                  | 6   | 2.10   | 0.02 | 0.70    | 0.646        |
| Polymer type:<br>soil extract:cycle | 6   | 3.82   | 0.03 | 1.27    | 0.264        |
| Residuals                           | 104 | 52.18  | 0.40 |         |              |

  

| <b>d</b> $\tau_{max}$               |     |        |      |         |              |
|-------------------------------------|-----|--------|------|---------|--------------|
|                                     | Df  | Sum Sq | R2   | F value | Pr(>F)       |
| Polymer type                        | 1   | 55.59  | 0.43 | 175.35  | <b>0.001</b> |
| Soil extract                        | 3   | 21.50  | 0.02 | 22.61   | <b>0.001</b> |
| cycle                               | 3   | 2.05   | 0.02 | 2.15    | 0.092        |
| Polymer type:<br>soil extract       | 3   | 1.89   | 0.01 | 1.99    | 0.118        |
| Polymer type:<br>cycle              | 3   | 10.71  | 0.08 | 11.26   | <b>0.001</b> |
| Soil extract:cycle                  | 6   | 0.39   | 0.00 | 0.20    | 0.972        |
| Polymer type:<br>soil extract:cycle | 6   | 3.90   | 0.03 | 2.05    | 0.075        |
| Residuals                           | 104 | 32.97  | 0.26 |         |              |

  

| <b>e</b> SI                         |     |        |      |         |              |
|-------------------------------------|-----|--------|------|---------|--------------|
|                                     | Df  | Sum Sq | R2   | F value | Pr(>F)       |
| Polymer type                        | 1   | 36.97  | 0.29 | 1271.29 | <b>0.001</b> |
| Soil extract                        | 3   | 41.19  | 0.32 | 472.24  | <b>0.001</b> |
| cycle                               | 3   | 11.71  | 0.09 | 134.27  | <b>0.001</b> |
| Polymer type:<br>soil extract       | 3   | 18.22  | 0.14 | 208.91  | <b>0.001</b> |
| Polymer type:<br>cycle              | 3   | 9.45   | 0.07 | 108.34  | <b>0.001</b> |
| Soil extract:cycle                  | 6   | 7.40   | 0.06 | 42.41   | <b>0.011</b> |
| Polymer type:<br>soil extract:cycle | 6   | 1.03   | 0.01 | 5.92    | <b>0.001</b> |
| Residuals                           | 104 | 3.02   | 0.02 |         |              |
